# Supplementary material
Source: Springer Nature journal article supplement (https://www.springermedizin.de/resource/supplementary/13058_2010_9479_MOESM6_ESM.pdf/9702240)

## A) Schemes of wild type and mutant survivin promoters

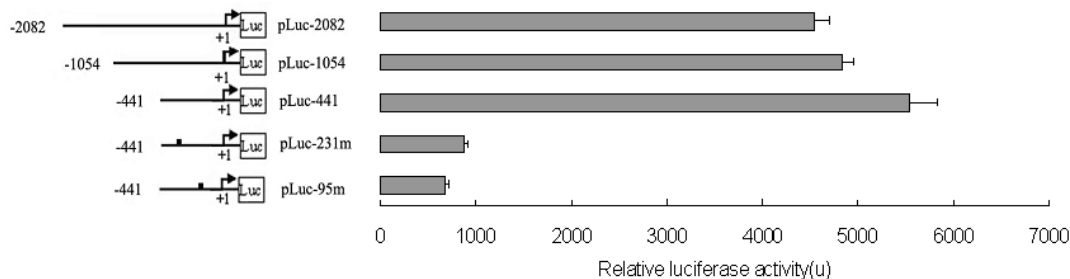

## B) Effect of pokemon on survivin promoter activity

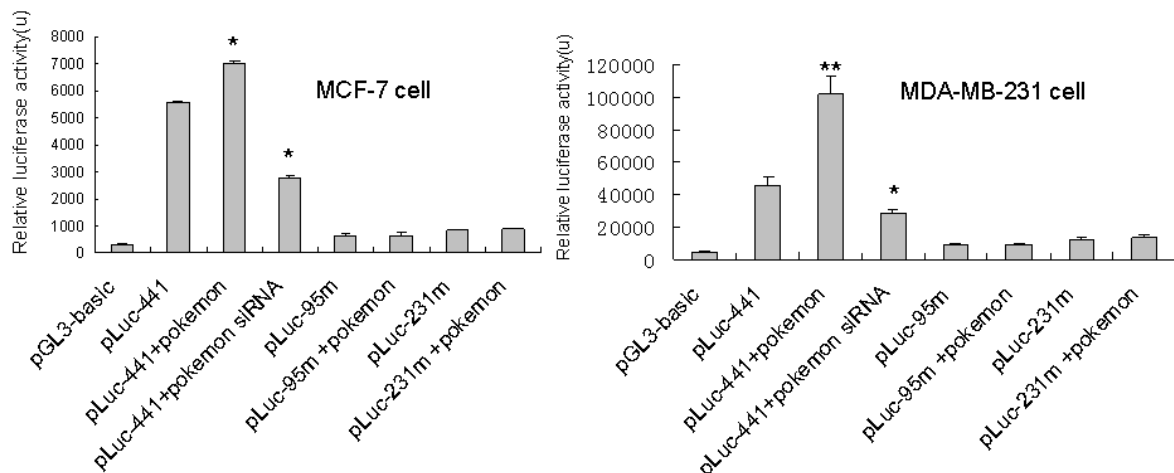

## C) ChIP assay

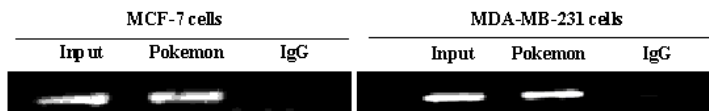

Supplement: MOESM6 [file 9702240]
